# Supplementary material
Source: MDPI journal article supplement (https://www.mdpi.com/1424-2818/15/2/274)
Supplement: s1 [file s1]

Archive with 2 entries (2 files):
- diversity-2149946-Suppl. Figure S1.pdf
- diversity-2149946-Suppl. Table S1.pdf
