# Supplementary material
Source: MDPI journal article supplement (https://www.mdpi.com/1424-2818/15/2/274)

**Figure S1.** A) Discriminant analysis of principal components (DAPC) including individuals from Iberian hatcheries (Escuelas and Bagà). B) STRUCTURE analyses considering the most likely number of genetically homogeneous groups among wild Sicilian samples ( $k = 4$ ) and including individuals from Iberian hatcheries as hatchery baselines.

**A)**

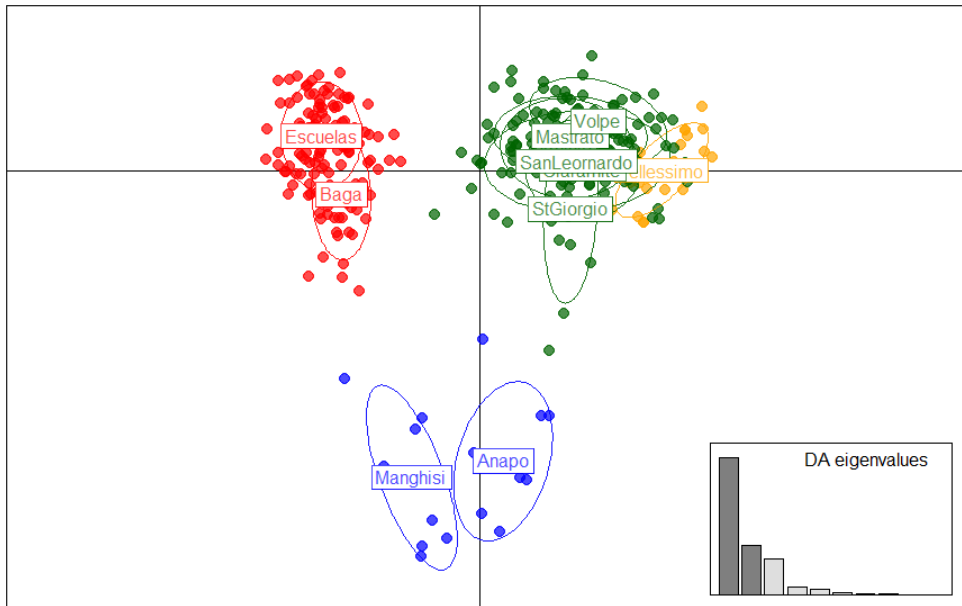

**B)**

**Bagà hatchery + Sicilian samples ( $k = 4$ )**

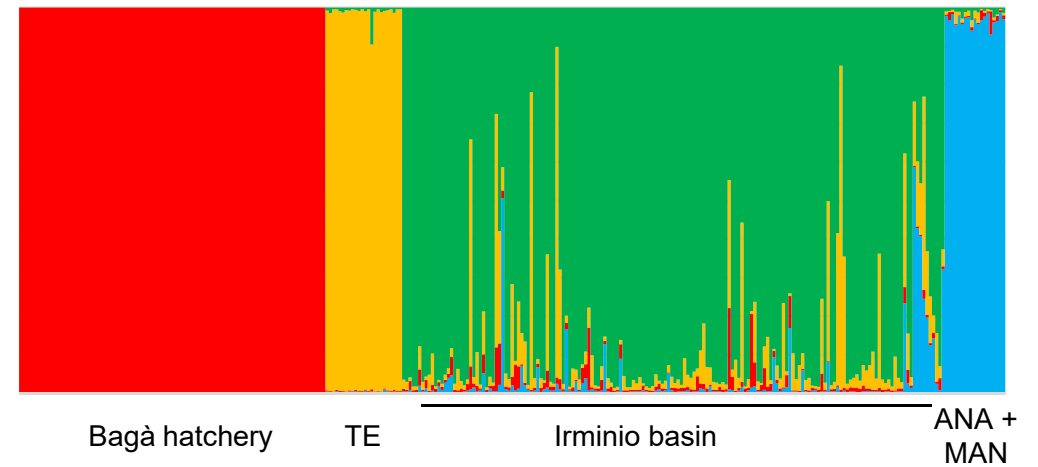

**Escuelas hatchery + Sicilian samples ( $k = 4$ )**

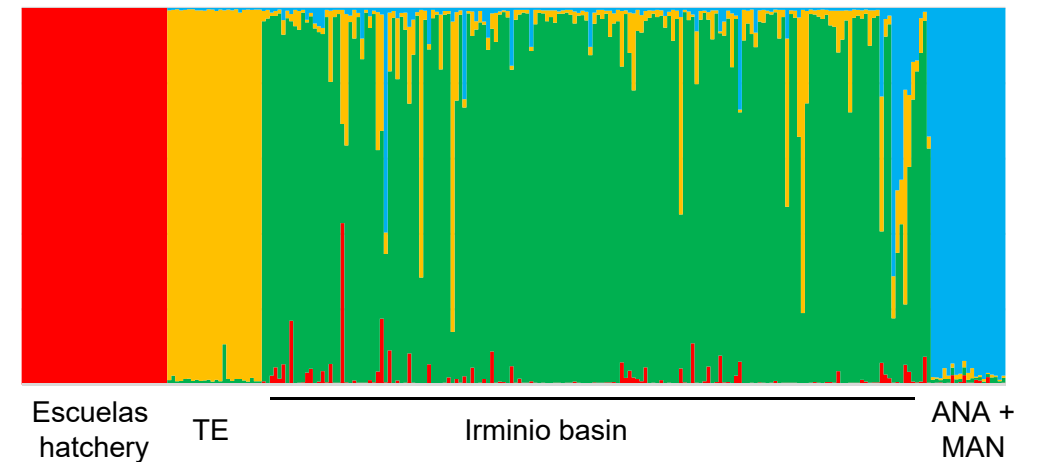

Supplement: s1 [file s1 › diversity-2149946-Suppl. Figure S1.pdf]
