# Supplementary material
Source: MDPI journal article supplement (https://www.mdpi.com/1424-2818/15/2/274)
Supplement: s1 [file s1 › diversity-2149946-Suppl. Table S1.pdf]

**Table S1** Hatchery origin of specimens from the Irminio and San Leonardo Rivers according to genetics (presence of the hatchery allele *LDH-C\*90*) and morphology [6]. In bold, individuals of pure hatchery or hybrid origin according genetics or morphology. Discrepancies between the two methods are shaded in grey.

| Code        | Sample                            | <i>LDH-C*</i>  | <b>Morphology</b> |
|-------------|-----------------------------------|----------------|-------------------|
| SL1         | St. Leonardo breeders 2011        | 100/100        | Native            |
| <b>SL2</b>  | <b>St. Leonardo breeders 2011</b> | <b>90/100</b>  | <b>Native</b>     |
| SL3         | St. Leonardo breeders 2011        | 100/100        | Native            |
| SL4         | St. Leonardo breeders 2011        | 100/100        | Native            |
| <b>SL5</b>  | <b>St. Leonardo breeders 2011</b> | <b>100/100</b> | <b>Hybrid?</b>    |
| <b>SL6</b>  | <b>St. Leonardo breeders 2011</b> | <b>90/100</b>  | <b>Native</b>     |
| <b>IR1</b>  | <b>Irminio breeders 2011</b>      | <b>90/100</b>  | <b>Native</b>     |
| <b>IR2</b>  | <b>Irminio breeders 2011</b>      | <b>90/100</b>  | <b>Native</b>     |
| <b>IR3</b>  | <b>Irminio breeders 2011</b>      | <b>90/100</b>  | <b>Hybrid?</b>    |
| <b>IR4</b>  | <b>Irminio breeders 2011</b>      | <b>100/100</b> | <b>Hybrid?</b>    |
| IR5         | Irminio breeders 2011             | 100/100        | Native            |
| <b>IR6</b>  | <b>Irminio breeders 2011</b>      | <b>90/100</b>  | <b>Hybrid?</b>    |
| <b>IR7</b>  | <b>Irminio breeders 2011</b>      | <b>100/100</b> | <b>Hybrid?</b>    |
| <b>IR8</b>  | <b>Irminio breeders 2011</b>      | <b>90/100</b>  | <b>Native</b>     |
| <b>IR9</b>  | <b>Irminio breeders 2011</b>      | <b>100/100</b> | <b>Hybrid?</b>    |
| IR10        | Irminio breeders 2011             | 100/100        | Native            |
| <b>IR11</b> | <b>Irminio breeders 2011</b>      | <b>90/100</b>  | <b>Native</b>     |
| IR12        | Irminio breeders 2011             | 100/100        | Native            |
| IR13        | Irminio breeders 2011             | 100/100        | Native            |
| <b>IR14</b> | <b>Irminio breeders 2011</b>      | <b>100/100</b> | <b>Hybrid?</b>    |
| IR15        | Irminio breeders 2011             | 100/100        | Native            |
| <b>IR16</b> | <b>Irminio breeders 2011</b>      | <b>90/100</b>  | <b>Native</b>     |
| IR17        | Irminio breeders 2011             | 100/100        | Native            |
| <b>IR18</b> | <b>Irminio breeders 2011</b>      | <b>90/100</b>  | <b>Native</b>     |
| <b>IR19</b> | <b>Irminio breeders 2011</b>      | <b>90/100</b>  | <b>Native</b>     |
| IR20        | Irminio breeders 2011             | 100/100        | Native            |
| IR21        | Irminio breeders 2011             | 100/100        | Native            |
| IR22        | Irminio breeders 2011             | 100/100        | Native            |
| IR23        | Irminio breeders 2011             | 100/100        | Native            |
| I2          | Irminio-river                     | 100/100        | Native            |
| <b>I7</b>   | <b>Irminio-river</b>              | <b>100/100</b> | <b>Hybrid</b>     |
| <b>I8</b>   | <b>Irminio-river</b>              | <b>90/100</b>  | <b>Hybrid</b>     |
| <b>I9</b>   | <b>Irminio-river</b>              | <b>90/100</b>  | <b>Native</b>     |
| <b>I10</b>  | <b>Irminio-river</b>              | <b>90/100</b>  | <b>Hybrid</b>     |
| <b>I11</b>  | <b>Irminio-river</b>              | <b>100/100</b> | <b>Hybrid</b>     |
| <b>I13</b>  | <b>Irminio-river</b>              | <b>100/100</b> | <b>Hybrid</b>     |
| I14         | Irminio-river                     | 100/100        | Native?           |

|            |                              |                |                 |
|------------|------------------------------|----------------|-----------------|
| I15        | Irminio-river                | 100/100        | Native?         |
| <b>T2</b>  | <b>Irminio-breeders 2010</b> | <b>100/100</b> | <b>Hatchery</b> |
| <b>T3</b>  | <b>Irminio-breeders 2010</b> | <b>90/100</b>  | <b>Native</b>   |
| T4         | Irminio-breeders 2010        | 100/100        | Native          |
| T5         | Irminio-breeders 2010        | 100/100        | Native          |
| T6         | Irminio-breeders 2010        | 100/100        | Native          |
| <b>T8</b>  | <b>Irminio-breeders 2010</b> | <b>100/100</b> | <b>Hybrid</b>   |
| T9         | Irminio-breeders 2010        | 100/100        | Native          |
| <b>T11</b> | <b>Irminio-breeders 2010</b> | <b>90/100</b>  | <b>Native</b>   |
| <b>T12</b> | <b>Irminio-breeders 2010</b> | <b>100/100</b> | <b>Hybrid?</b>  |
| <b>T13</b> | <b>Irminio-breeders 2010</b> | <b>90/100</b>  | <b>Native</b>   |
| T15        | <b>Irminio-breeders 2010</b> | <b>90/90</b>   | <b>Hybrid</b>   |
| T16        | <b>Irminio-breeders 2010</b> | <b>90/100</b>  | <b>Hybrid</b>   |
| T17        | Irminio-breeders 2010        | 100/100        | Native          |
| <b>T18</b> | <b>Irminio-breeders 2010</b> | <b>90/100</b>  | <b>Native</b>   |
| <b>T19</b> | <b>Irminio-breeders 2010</b> | <b>90/100</b>  | <b>Native</b>   |
| <b>T20</b> | <b>Irminio-breeders 2010</b> | <b>90/90</b>   | <b>Native</b>   |
| T21        | Irminio-breeders 2010        | 100/100        | Native          |
| T22        | Irminio-breeders 2010        | 100/100        | Native          |
| <b>T23</b> | <b>Irminio-breeders 2010</b> | <b>100/100</b> | <b>Hybrid?</b>  |
| <b>T24</b> | <b>Irminio-breeders 2010</b> | <b>90/100</b>  | <b>Native</b>   |
| T25        | Irminio-breeders 2010        | 100/100        | Native          |
| <b>T26</b> | <b>Irminio-breeders 2010</b> | <b>90/100</b>  | <b>Hybrid?</b>  |
| T27        | Irminio-breeders 2010        | 100/100        | Native          |
| T28        | Irminio-breeders 2010        | 100/100        | Native          |
| T29        | Irminio-breeders 2010        | 100/100        | Native          |
| T30        | Irminio-breeders 2010        | 100/100        | Native          |
| T31        | Irminio-breeders 2010        | 100/100        | Native          |
| T32        | Irminio-breeders 2010        | 100/100        | Native          |
| <b>T33</b> | <b>Irminio-breeders 2010</b> | <b>100/100</b> | <b>Hybrid?</b>  |
| T34        | Irminio-breeders 2010        | 100/100        | Native          |
| T35        | Irminio-breeders 2010        | 100/100        | Native          |
